# Supplementary material for: Biodegradation of Di-(2-ethylhexyl) Phthalate by Rhodococcus ruber YC-YT1 in Contaminated Water and Soil
Source: PubMed Central journal article supplement (PMC5982003; doi:10.3390/ijerph15050964), 2018-05-11
Supplement: ijerph-15-00964-s001.pdf [file ijerph-15-00964-s001.pdf]

# Biodegradation of Di-(2-ethylhexyl) phthalate by *Rhodococcus ruber* YC-YT1 in Contaminated Water and Soil

Ting Yang<sup>1</sup>, Lei Ren<sup>2</sup>, Yang Jia<sup>1</sup>, Shuanghu Fan<sup>1</sup>, Junhuan Wang<sup>1</sup>, Jiayi Wang<sup>1</sup>, Ruth Nahurira<sup>1</sup>, Haisheng Wang<sup>1</sup>, and Yanchun Yan<sup>1,\*</sup>

<sup>1</sup> Graduate School, Chinese Academy of Agricultural Sciences, Beijing 100081, China; e-mail 13838348327@163l.com

<sup>2</sup> Agricultural College of Guangdong Ocean University, Zhanjiang 524088, China; e-mail lren\_87@hotmail.com

\* Correspondence: e-mail yanyanchun@caas.cn; Tel.: +86 10 82109685

Figure. S1. The structures of target contaminants (the name was listed under the structure).

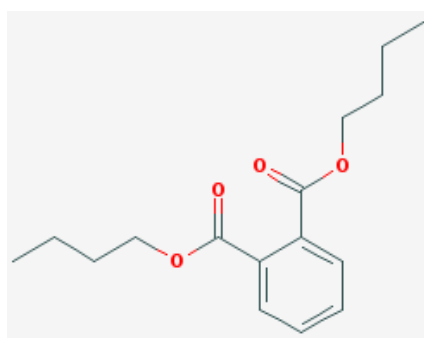

Dibutyl phthalate (DBP)

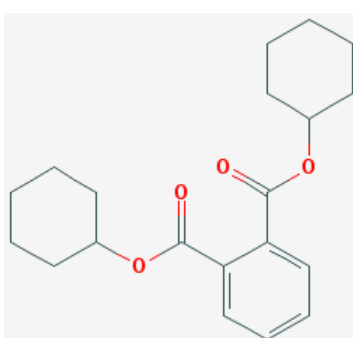

Dicyclohexyl phthalate (DCHP)

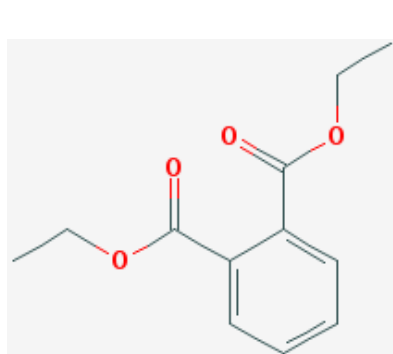

Diethyl phthalate (DEP)

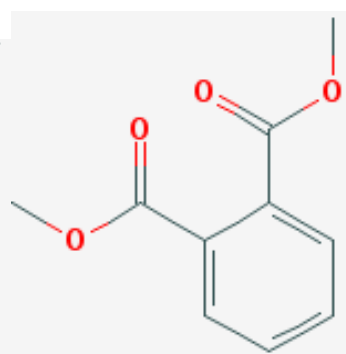

Dimethyl phthalate (DMP)

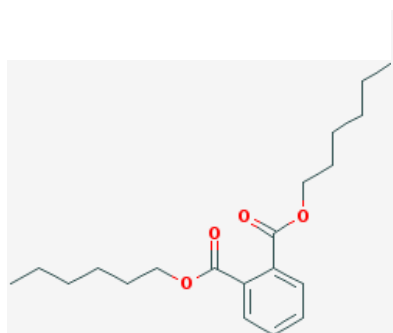

Dihexyl phthalate (DHP)

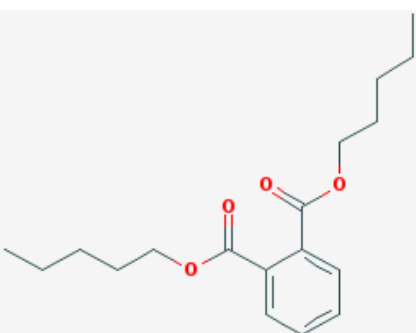

Dipentyl phthalate (DAP)

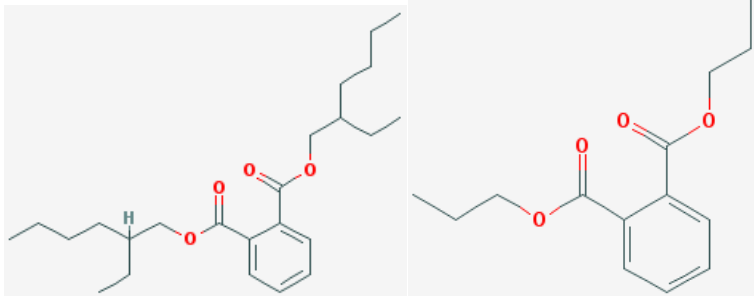

Di-(2-ethyl hexyl) phthalate (DEHP)    Dipropyl phthalate (DPrP)

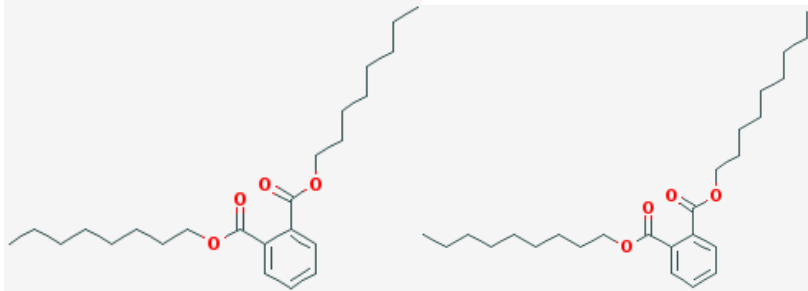

Di-n-octyl phthalate (DOP)    Dinonyl phthalate (DNP)

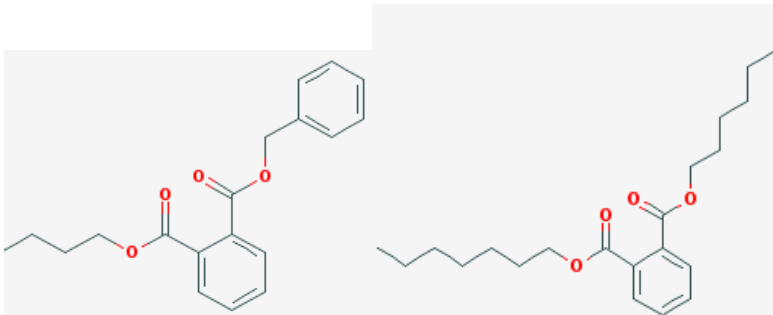

Butyl benzyl phthalate (BBP)    Di-n-heptyl phthalate (DHPP)

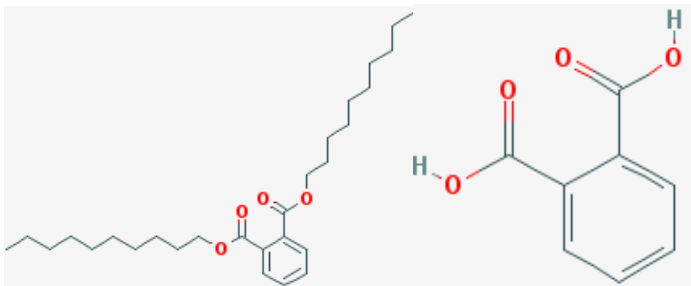

Didecyl phthalate (DDP)    Phthalate acid (PA)

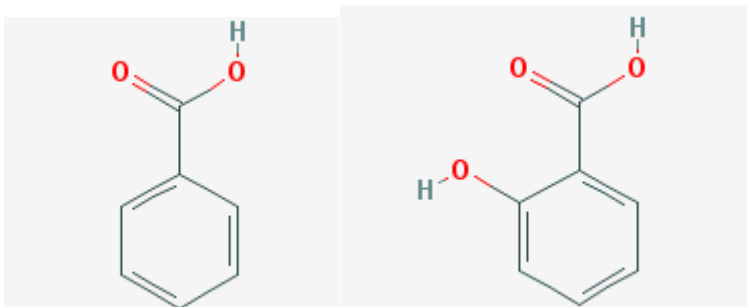

Benzoic acid (BA)

Salicylic acid (SA)



**Figure. S2.** Partial photos of the bioprocess with environmental samples. (A, natural soils with light after 5 days incubation; B, river water with light after 5 days incubation; C, Sediments with light after 5 days incubation; D, Seawater with light after 5 days incubation.) Sterilized water was supplemented when necessary.

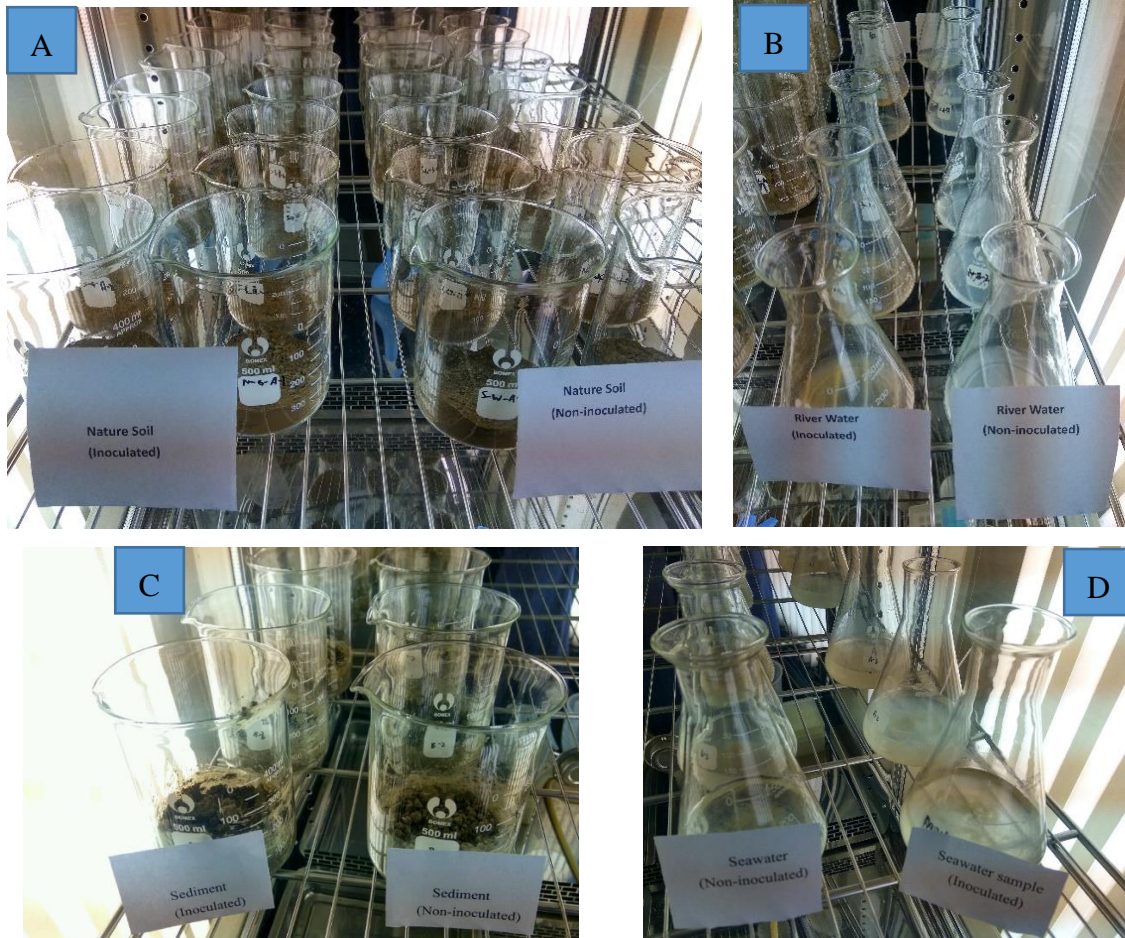

**Figure. S3.** HPLC-MS analysis results of DEHP degradation intermediates. The chemical structure of potential intermediates was presented in each figure.

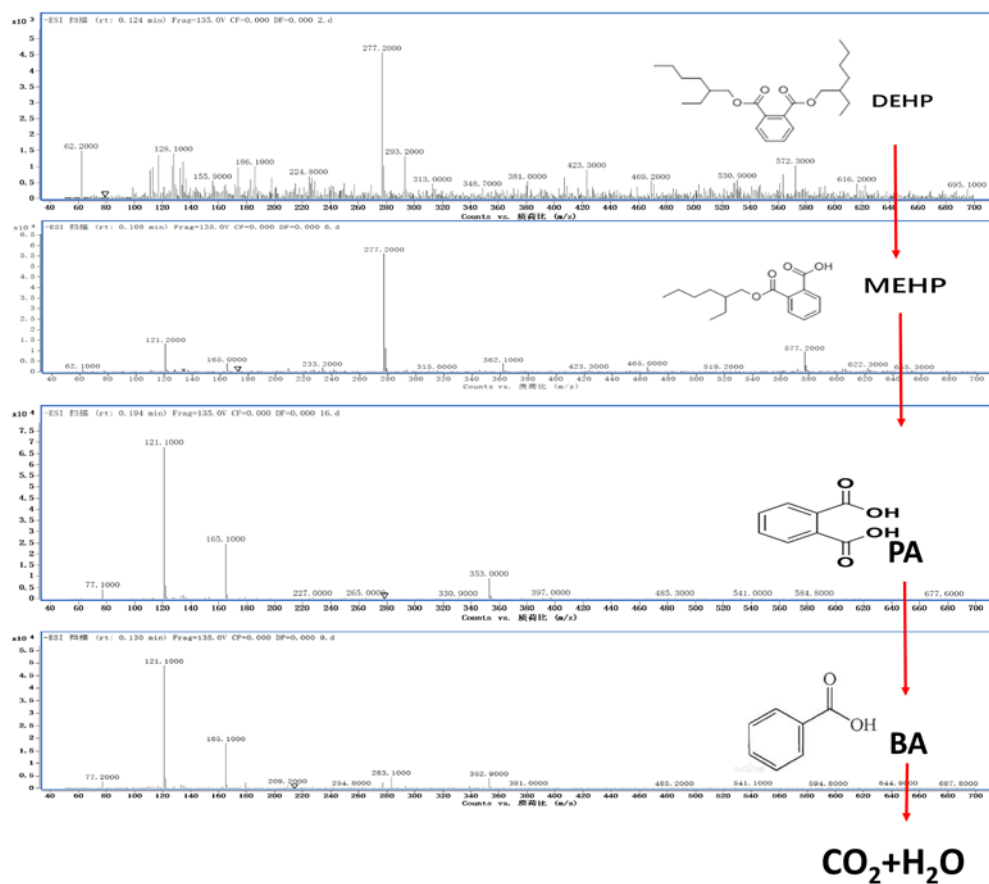

**Figure. S4.** The sediment samples in intertidal zone from the Dameisha coastline.

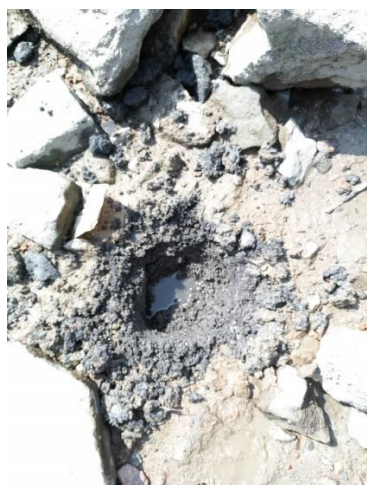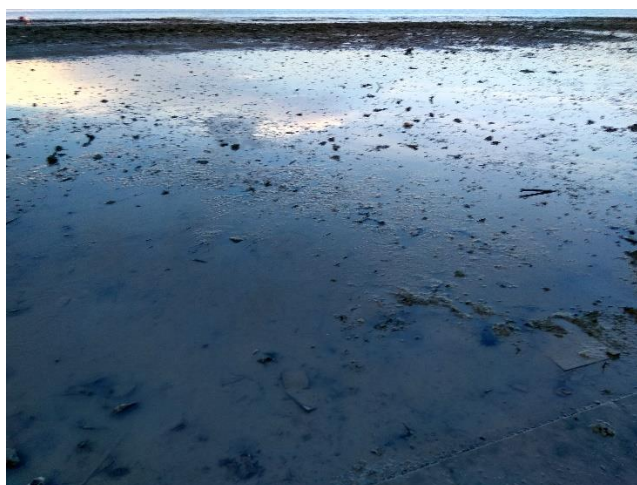

**Table S1.** Physicochemical properties of soils

| Soil type  | Source      | Location          | pH <sup>1</sup> | OM (g/kg) | TN (g/kg) | TP (g/kg) | DEHP concentration (mg/kg) |
|------------|-------------|-------------------|-----------------|-----------|-----------|-----------|----------------------------|
| Cultivated | Wheat field | 45°40'N, 126°35'E | 6.39            | 27.26     | 1.20      | 0.22      | 0.31                       |
| Natural    | Garden Soil | 39°57'N, 116°19'E | 7.23            | 37.27     | 1.37      | 0.14      | ND                         |

OM means organic matter. TN means total nitrogen. TP means total phosphorus. DEHP means di-(2-ethyl hexyl) phthalate. ND means not detected.

**Table S2.** Physicochemical properties of water.

| Water type  | Location          | pH <sup>1</sup> | SS (mg/kg) | COD (mg/L) | Conductivity ( $\mu\text{S cm}^{-1}$ ) | DEHP concentration (mg/L) |
|-------------|-------------------|-----------------|------------|------------|----------------------------------------|---------------------------|
| River water | 40°02'N, 126°29'E | 7.42            | 12.37      | 23.7       | 103.9                                  | 0.24                      |

SS means suspended solid. COD means chemical oxygen demand and it was determined by the potassium chromate method. DEHP means di-(2-ethyl hexyl) phthalate.

**Table S3.** Physicochemical properties of coastal sediment and seawater.

| Sediment                   |                   | Seawater                               |                   |
|----------------------------|-------------------|----------------------------------------|-------------------|
| Location                   | 22°59'N, 114°31'E | Location                               | 22°59'N, 114°31'E |
| pH <sup>1</sup>            | 7.7               | pH <sup>1</sup>                        | 7.6               |
| Salinity(%)                | 3.22              | Salinity(%)                            | 3.61              |
| ORP (mV)                   | -240              | ORP (mV)                               | 50                |
| Moisture content (%)       | 58.8              | Optical density                        | 0.86              |
| TOC (ng/g)                 | 7905              | Conductivity ( $\mu\text{S cm}^{-1}$ ) | 523               |
| TN (g/kg)                  | 2.2               | SS (mg/kg)                             | 15.62             |
| TP (g/kg)                  | 1.3               | COD (mg/L)                             | 25.1              |
| DEHP concentration (mg/kg) | 7.1               | DEHP concentration (mg/L)              | 3.8               |

TN means total nitrogen. TP means total phosphorus. ORP means oxidation-reduction potential. TOC means total organic carbon. SS means suspended solid. COD means chemical oxygen demand and it was determined by the potassium chromate method. DEHP means di-(2-ethyl hexyl) phthalate.
